# Supplementary material for: Diacenopentalene dicarboximides as new n-type organic semiconductors for field-effect transistors
Source: Royal Society of Chemistry journal article supplement (doi:10.1039/c6tc02601j), 2016-01-01
Supplement: c6tc02601j1.pdf [file c6tc02601j1.pdf]

*Electronic Supplementary Information (ESI) for*

**Diacenopentalene dicarboximides as new n-type organic  
semiconductors for field effect transistors**

Gaole Dai,\* Jingjing Chang, Linzhi Jing, and Chunyan Chi\*

**Table of contents**

|                                                      |    |
|------------------------------------------------------|----|
| 1. DFT calculation details.....                      | S2 |
| 2. Differential pulse voltammetry (DPV) curves ..... | S4 |
| 3. TGA and DSC curves .....                          | S5 |
| 4. NMR spectra of all new compounds.....             | S6 |

## 1. DFT calculation details

DFT calculations have been performed at the B3LYP/6-31G\*<sup>1-5</sup> level of theory, as implemented in the Gaussian 09 program package.<sup>6</sup> Absorption spectra of **DBPDI** and **DNPDI** were calculated by TD DFT at B3LYP/6-31G\* level.

**Table S1.** Selected TD-DFT (B3LYP/6-31G\*) calculated energies, oscillator strength and compositions of major electronic transitions of **DBPDI**.

| Wavelength (nm) | Osc. Strength ( <i>f</i> ) | Major contributions              |
|-----------------|----------------------------|----------------------------------|
| 614.0           | 0.0000                     | HOMO->LUMO (99%)                 |
| 488.2           | 0.3379                     | H-1->LUMO (94%)                  |
| 364.5           | 0.1160                     | H-5->LUMO (72%), HOMO->L+1 (10%) |
| 351.8           | 0.1938                     | H-5->LUMO (10%), HOMO->L+1 (78%) |
| 300.4           | 0.1959                     | H-13->LUMO (63%), H-1->L+2 (27%) |
| 292.3           | 1.2580                     | H-1->L+2 (15%), HOMO->L+3 (57%)  |

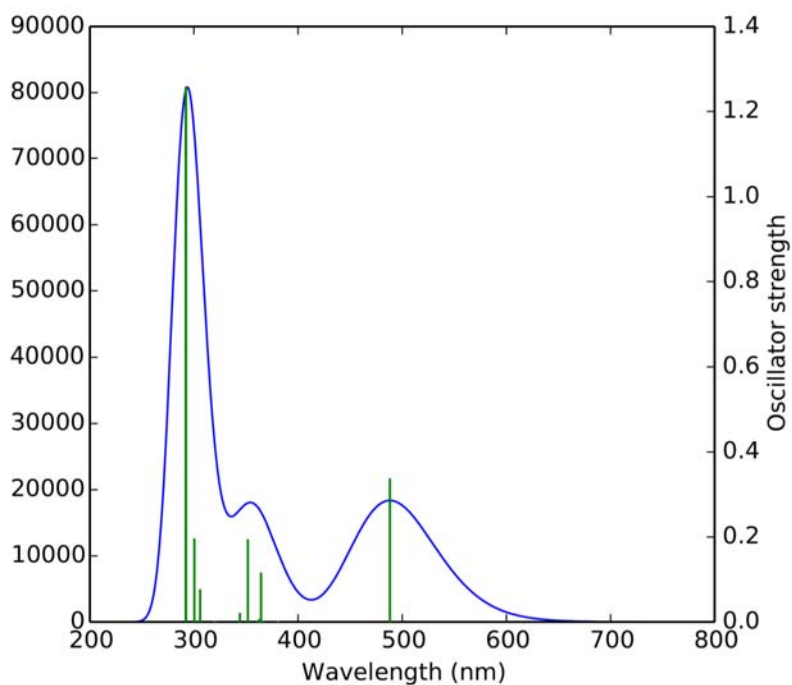

**Figure S1.** Calculated (B3LYP/6-31G\*) absorption spectrum of **DBPDI**.

**Table S2.** Selected TD-DFT (B3LYP/6-31G\*) calculated energies, oscillator strength and compositions of major electronic transitions of **DNPDI**.

| Wavelength (nm) | Osc. Strength ( <i>f</i> ) | Major contributions                                                                |
|-----------------|----------------------------|------------------------------------------------------------------------------------|
| 512.3           | 0.5057                     | HOMO->LUMO (92%)                                                                   |
| 364.8           | 0.2907                     | H-3->LUMO (72%), H-1->L+1 (18%)                                                    |
| 352.2           | 0.6585                     | H-1->L+1 (43%), HOMO->L+3 (18%), HOMO->L+4 (20%)                                   |
| 334.3           | 0.5457                     | H-6->LUMO (18%), H-1->L+1 (14%), H-1->L+2 (21%), HOMO->L+3 (10%), HOMO->L+4 (27%)  |
| 332.4           | 0.4603                     | H-8->LUMO (12%), H-6->LUMO (39%), H-1->L+2 (12%), HOMO->L+4 (18%)                  |
| 330.2           | 0.1145                     | H-8->LUMO (86%)                                                                    |
| 328.2           | 0.7654                     | H-6->LUMO (13%), H-3->LUMO (10%), H-1->L+2 (29%), HOMO->L+3 (18%), HOMO->L+4 (13%) |

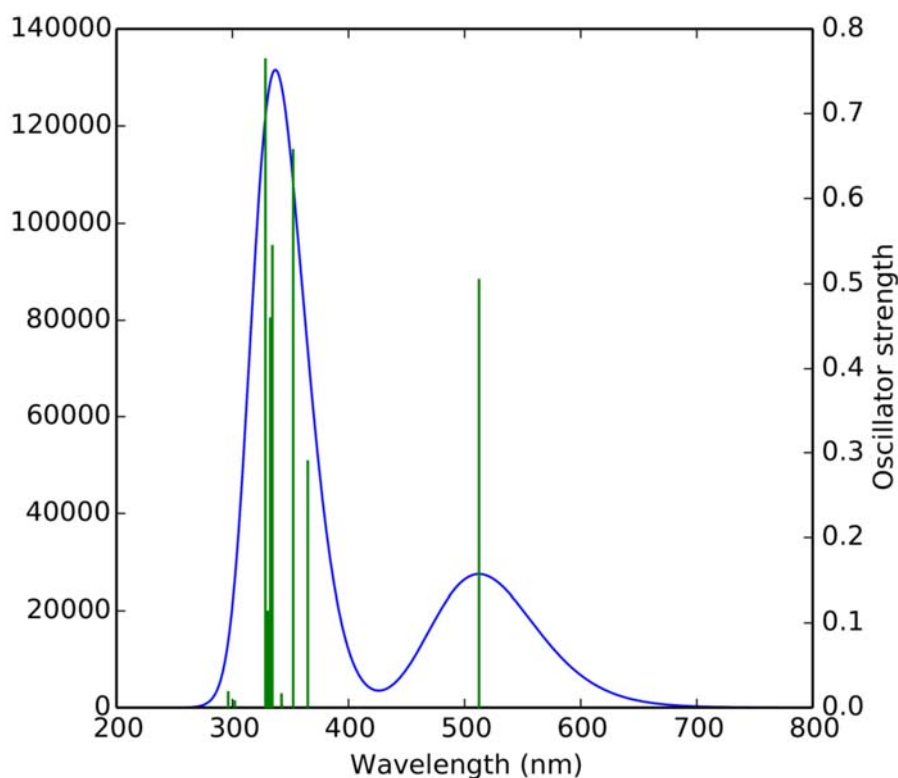

**Figure S2.** Calculated (B3LYP/6-31G\*) absorption spectrum of **DNPDI**.

### References:

1. Becke, A. D. *J. Chem. Phys.* **1993**, 98, 5648.
2. Lee, C.; Yang, W.; Parr, R. G. *Phys. Rev. B: Condens. Matter* **1988**, 37, 785.
3. Ditchfie, R. W.; Hehre, J.; Pople, J. A. *J. Chem. Phys.* **1971**, 54, 724.
4. Hehre, W. J.; Ditchfie R.; Pople, J. A. *J. Chem. Phys.* **1972**, 56, 2257.
5. Harihara, P. C.; Pople, J. A. *Theor. Chim.Acta* **1973**, 28, 213.
6. *Gaussian 09; Revision A.2*; Frisch, M. J.; Trucks, G. W.; Schlegel, H. B.; Scuseria, G. E.; Robb, M. A.; Cheeseman, J. R.; Scalmani, G.; Barone, V.; Mennucci, B.; Petersson, G. A.; Nakatsuji, H.; Caricato, M.; Li, X.; Hratchian, H. P.; Izmaylov, A. F.; Bloino, J.; Zheng, G.; Sonnenberg, J. L.; Hada, M.; Ehara, M.; Toyota, K.; Fukuda, R.; Hasegawa, J.; Ishida, M.; Nakajima, T.; Honda, Y.; Kitao, O.; Nakai, H.; Vreven, T.; Montgomery, J., J. A.; Peralta, J. E.; Ogliaro, F.; Bearpark, M.; Heyd, J. J.; Brothers, E.; Kudin, K. N.; Staroverov, V. N.; Kobayashi, R.; Normand, J.; Raghavachari, K.; Rendell, A.; Burant, J. C.; Iyengar, S. S.; Tomasi, J.; Cossi, M.; Rega, N.; Millam, N. J.; Klene, M.; Knox, J. E.; Cross, J. B.; Bakken, V.; Adamo, C.; Jaramillo, J.; Gomperts, R.; Stratmann, R. E.; Yazyev, O.; Austin, A. J.; Cammi, R.; Pomelli, C.; Ochterski, J. W.; Martin, R. L.; Morokuma, K.; Zakrzewski, V. G.; Voth, G. A.; Salvador, P.; Dannenberg, J. J.; Dapprich, S.; Daniels, A. D.; Farkas, Ö.; Foresman, J. B.; Ortiz, J. V.; Cioslowski, J.; Fox, D. J.; Gaussian, Inc., Wallingford CT, 2009.

## 2. Differential pulse voltammograms

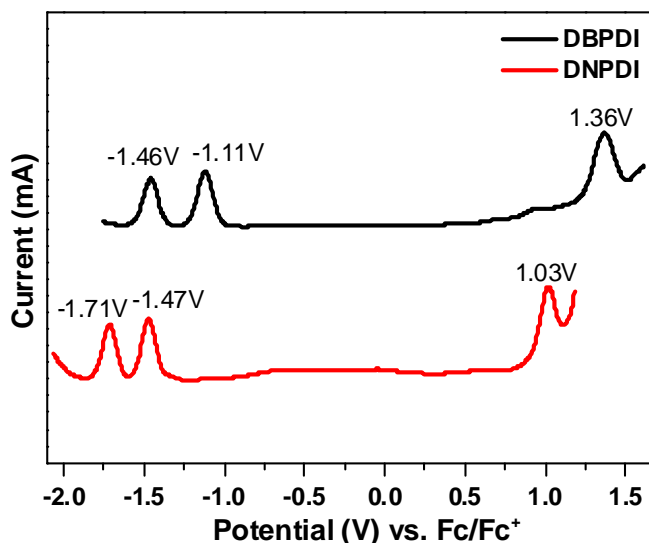

**Figure S3** Differential pulse voltammograms ( $1 \times 10^{-3} \text{ M}$ ) of compounds **DBPDI** and **DNPDI** in dry dichloromethane with 0.1 M  $\text{Bu}_4\text{NPF}_6$  as the supporting electrolyte,  $\text{AgCl/Ag}$  as reference electrode, Au as working electrode (surface area =  $12.6 \text{ mm}^2$ ), Pt wire as counter electrode (potential step = 0.004 V, pulse amplitude = 0.05 V, pulse width = 0.05 s in the oxidation mode).

### 3. TGA and DSC curves

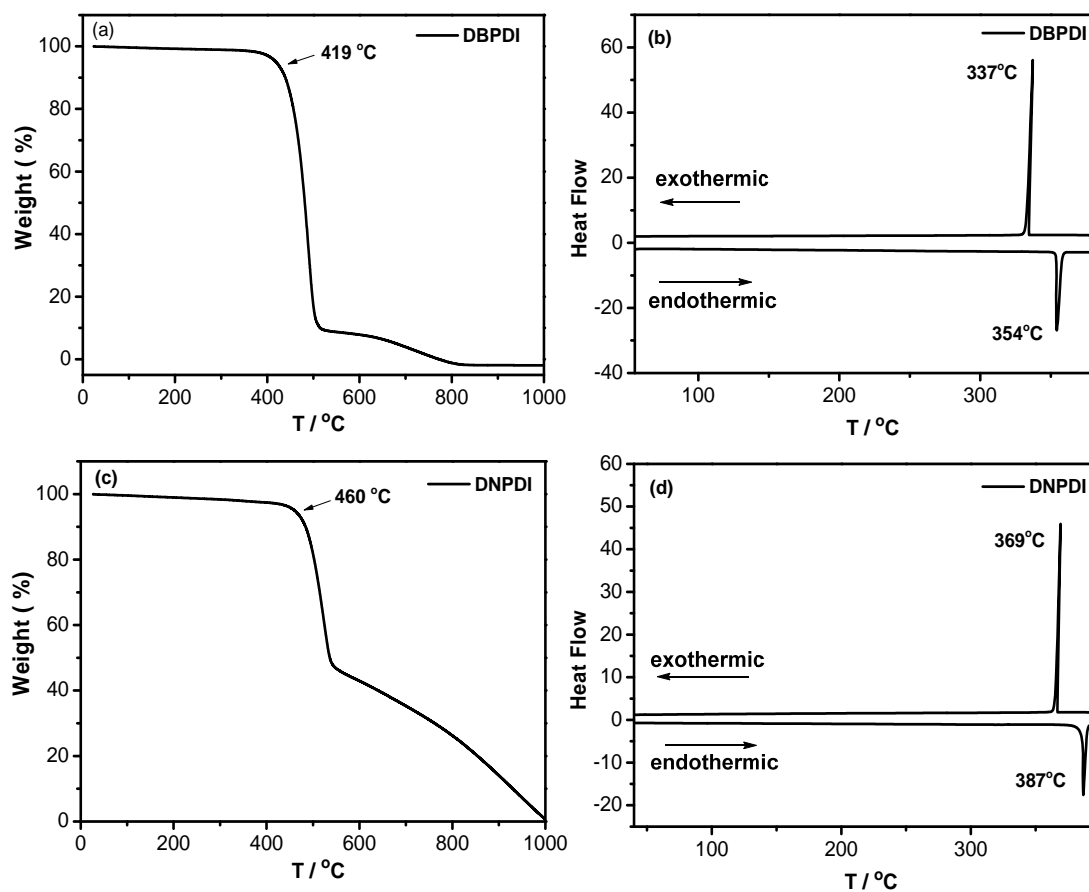

**Figure S4** Thermogravimetric analysis (TGA) of compounds **DBPDI** (a) and **DNPDI** (c); Differential scanning calorimetry (DSC) of compounds **DBPDI** (b) and **DNPDI** (d) in N<sub>2</sub> at a heating rate of 10 °C min<sup>-1</sup>

6. NMR spectra of all new compounds

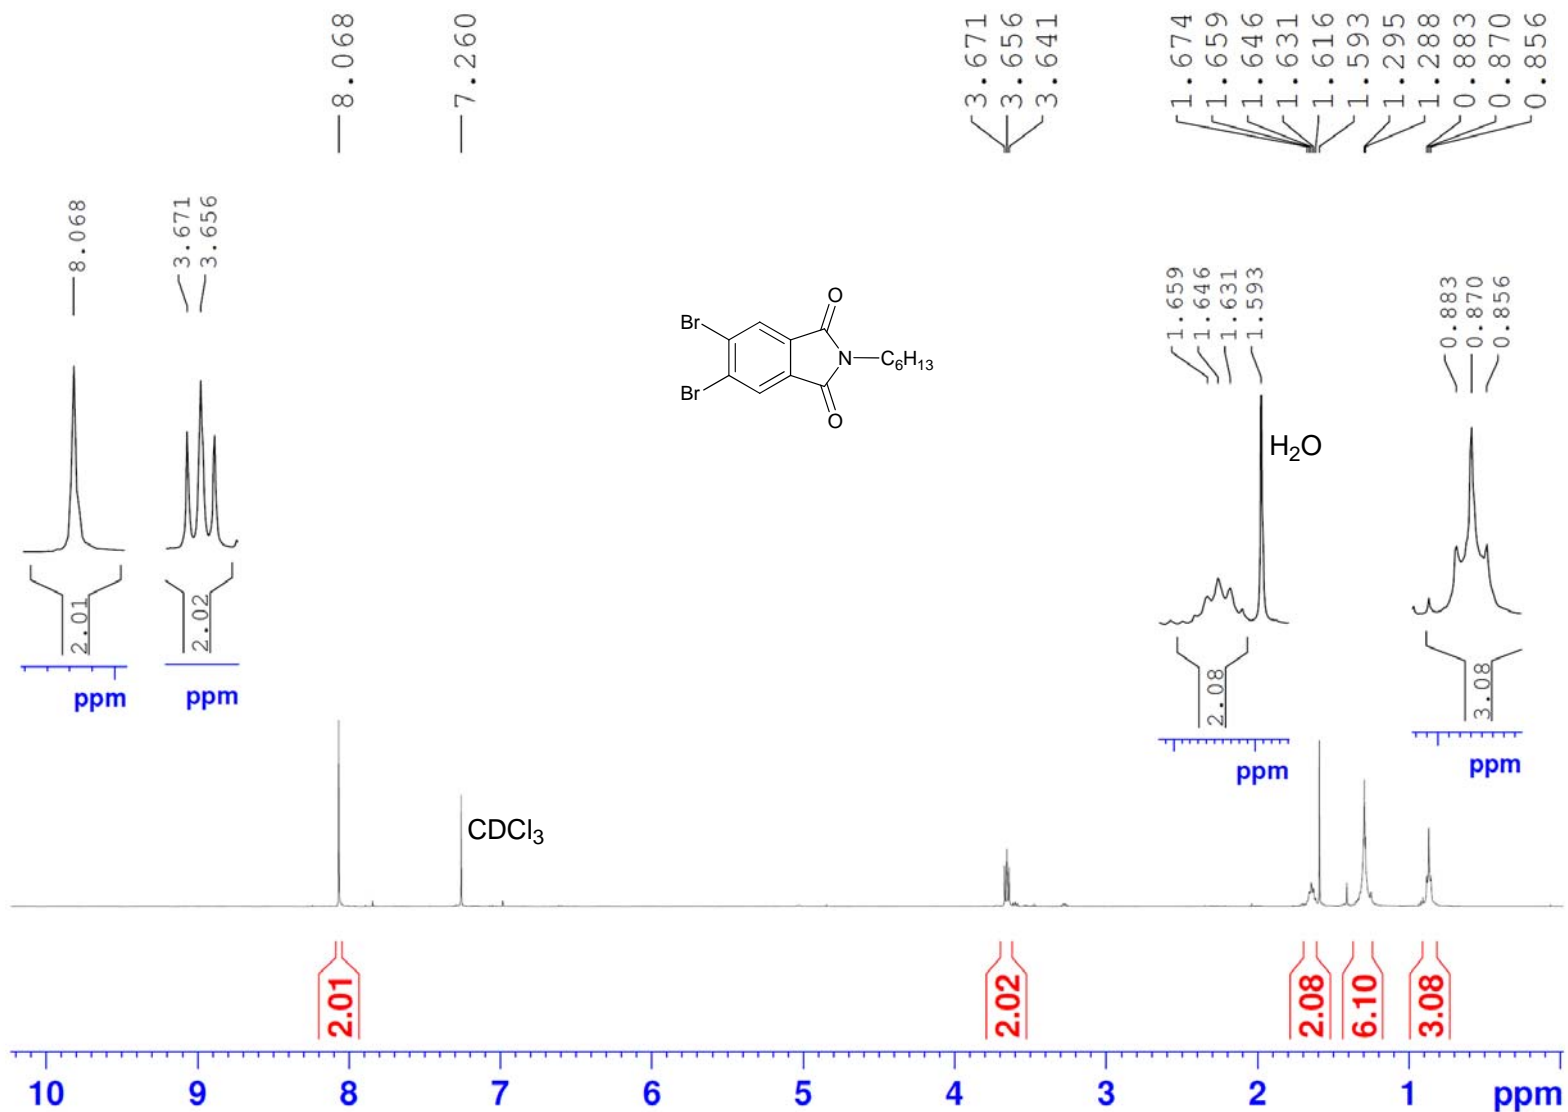

Figure S5  $^1\text{H}$  NMR (500 MHz) spectrum of compound 2 in  $\text{CDCl}_3$

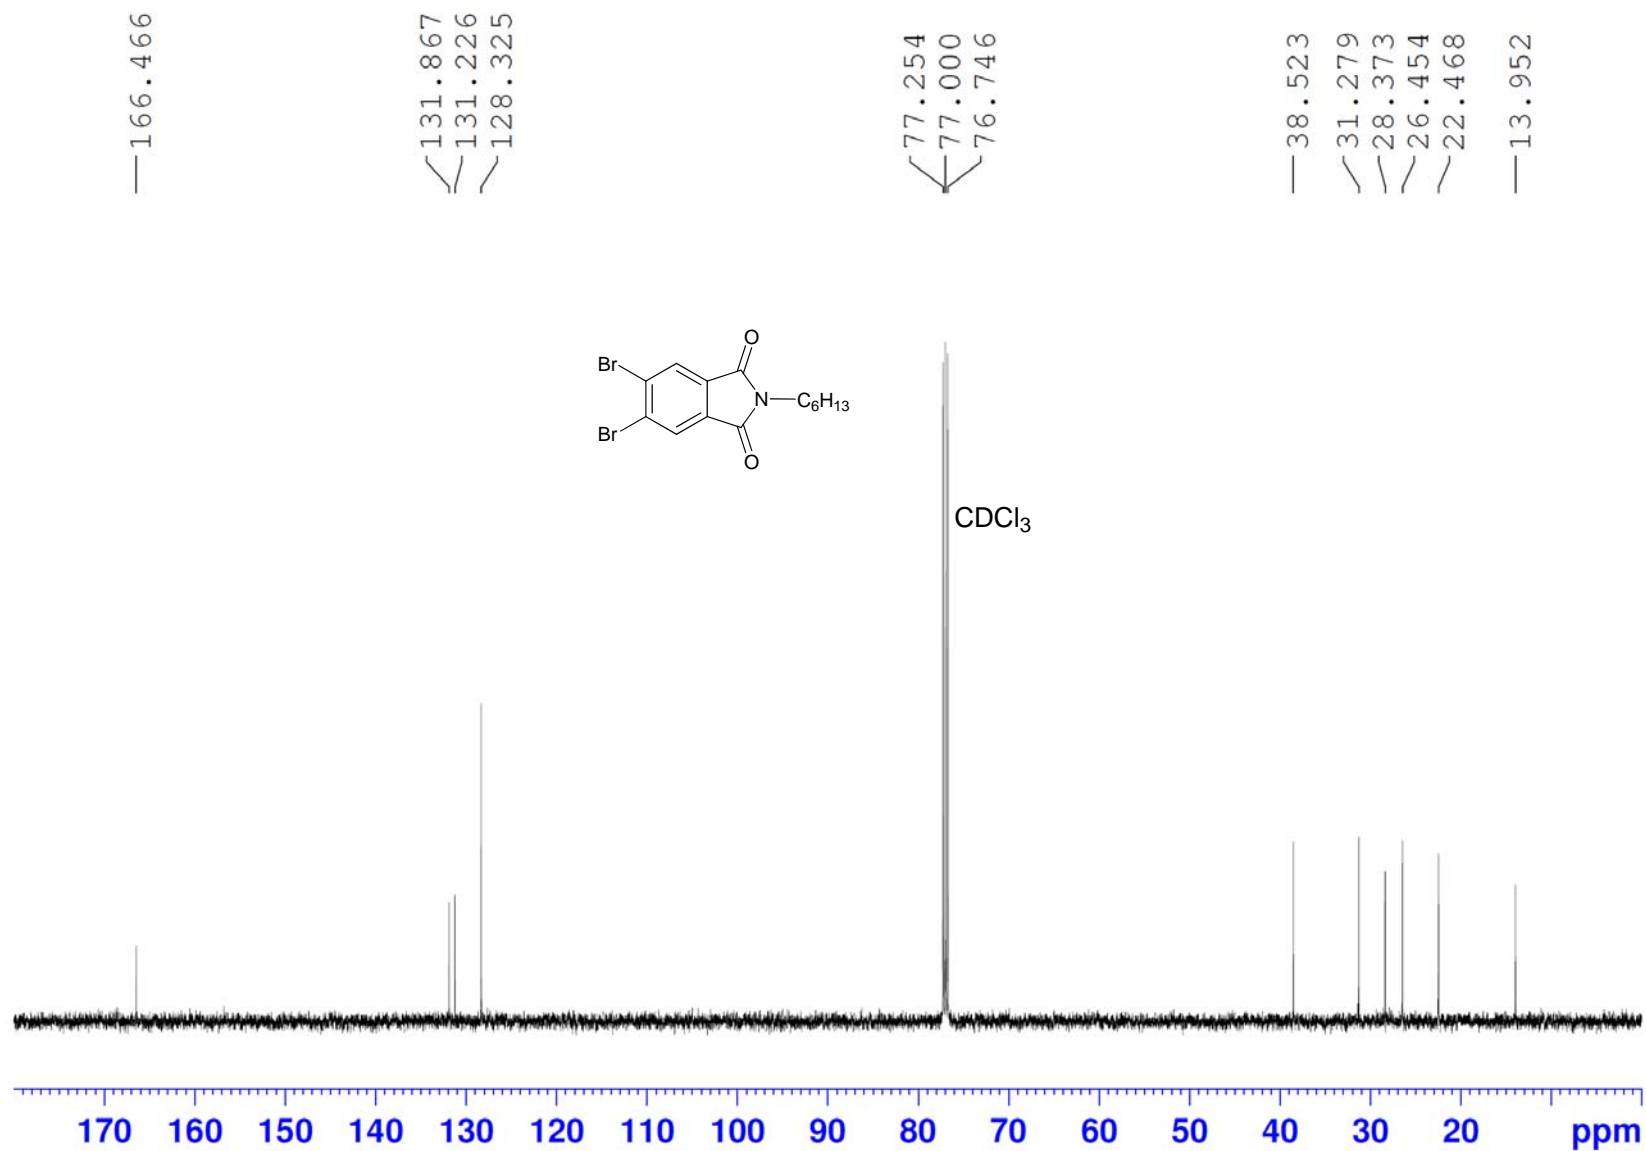

Figure S6  $^{13}\text{C}$  NMR (125 MHz) spectrum of compound 2 in  $\text{CDCl}_3$

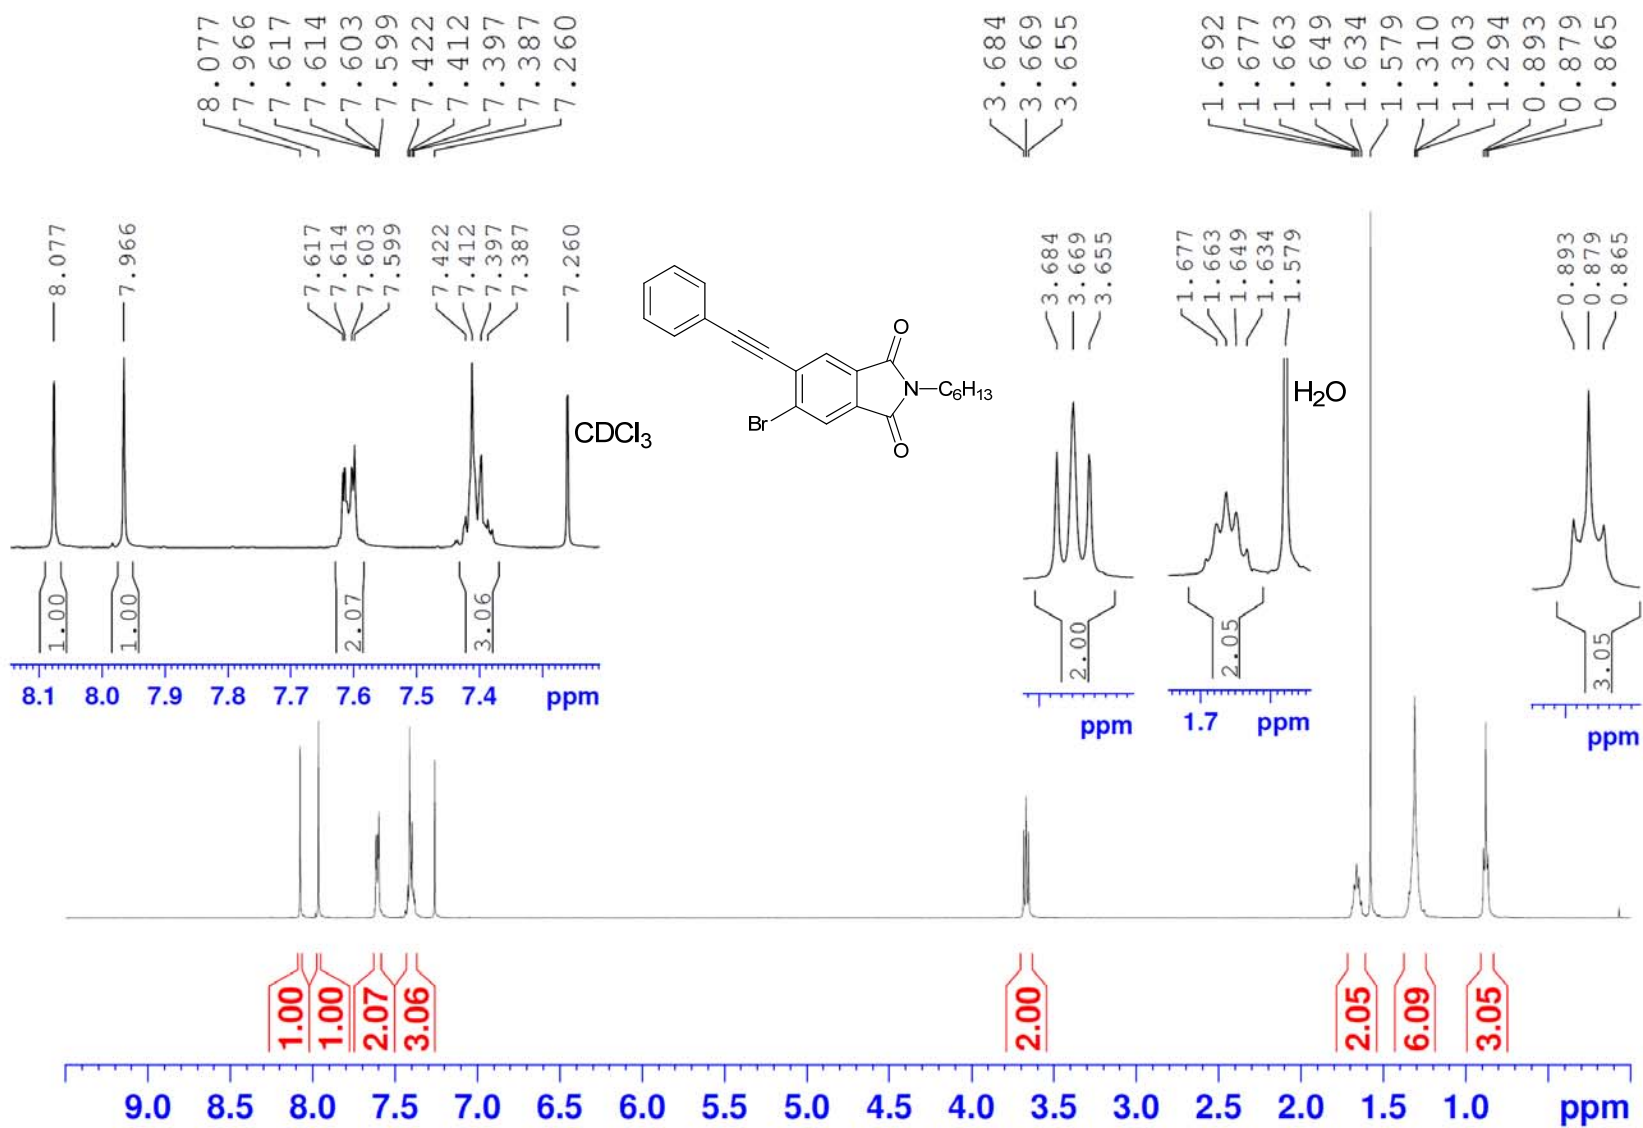

Figure S7 <sup>1</sup>H NMR (500 MHz) spectrum of compound 3 in CDCl<sub>3</sub>



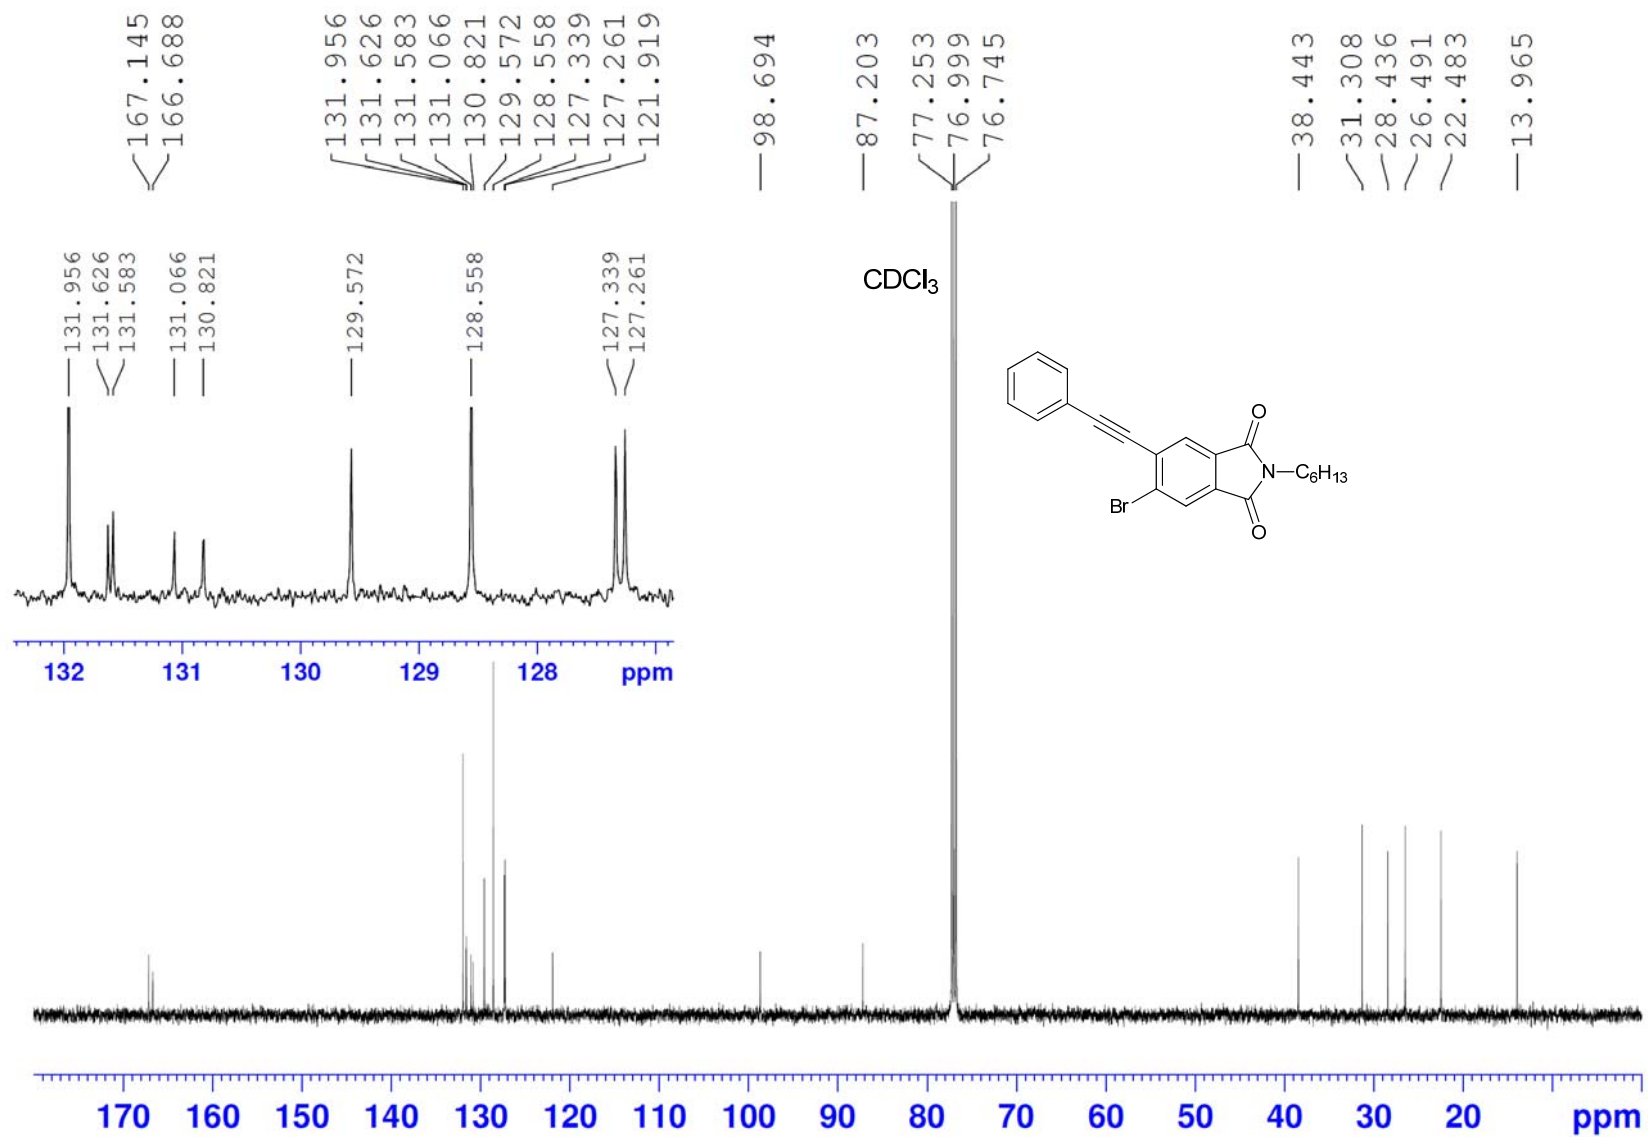

Figure S8  $^{13}\text{C}$  NMR (125 MHz) spectrum of compound 3 in  $\text{CDCl}_3$

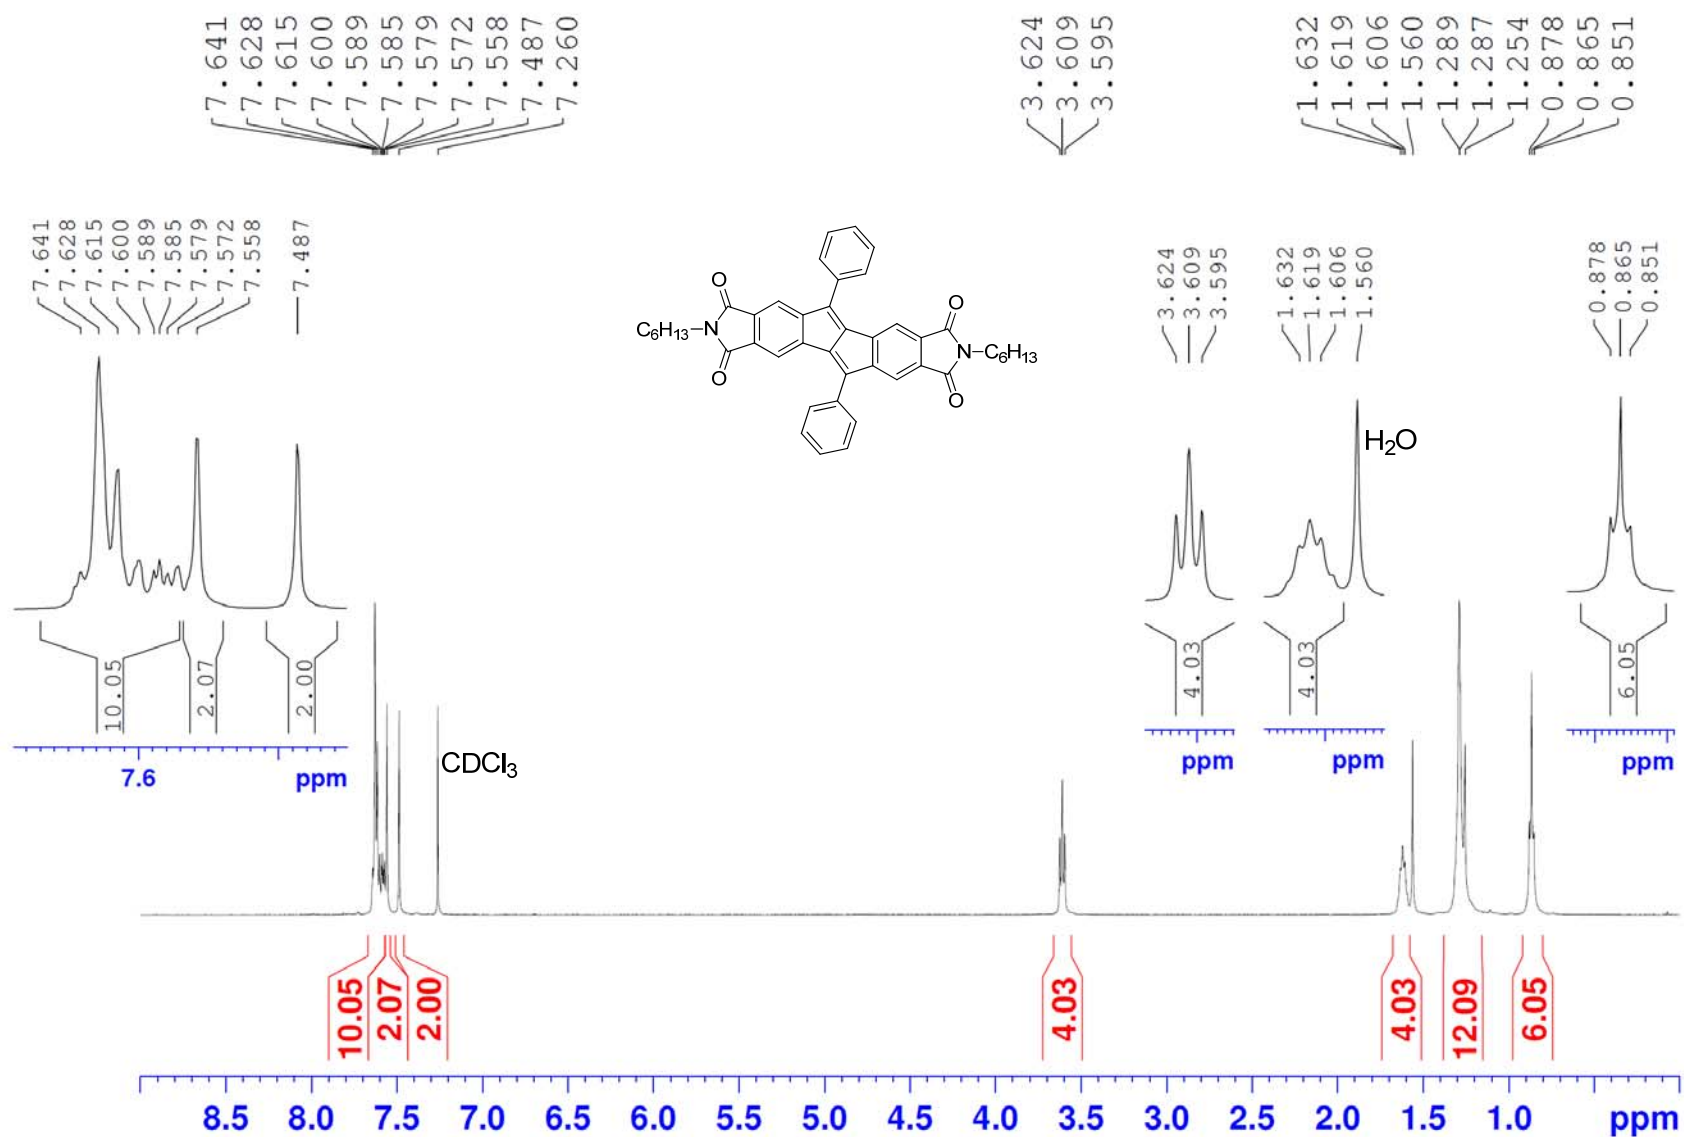

Figure S9 <sup>1</sup>H NMR (500 MHz) spectrum of compound DBPDI in CDCl<sub>3</sub>

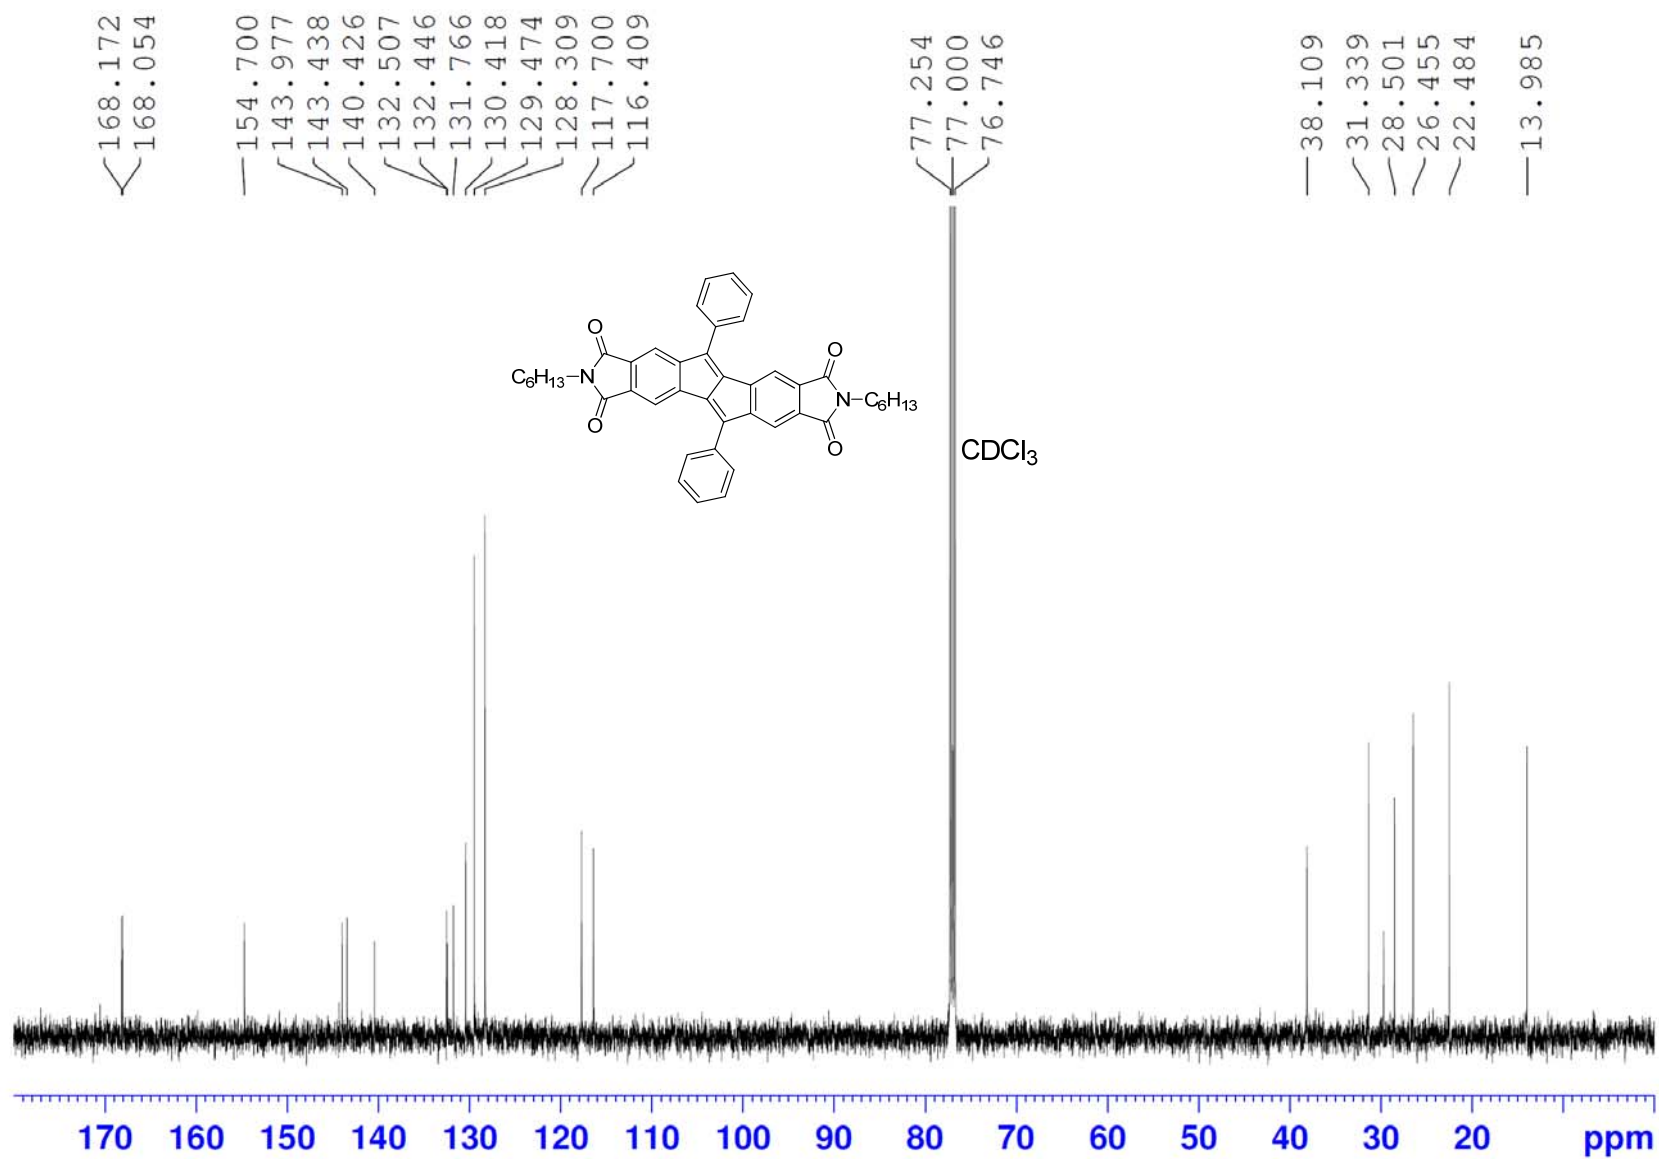

Figure S10 <sup>13</sup>C NMR (125 MHz) spectrum of compound DBPDI in CDCl<sub>3</sub>

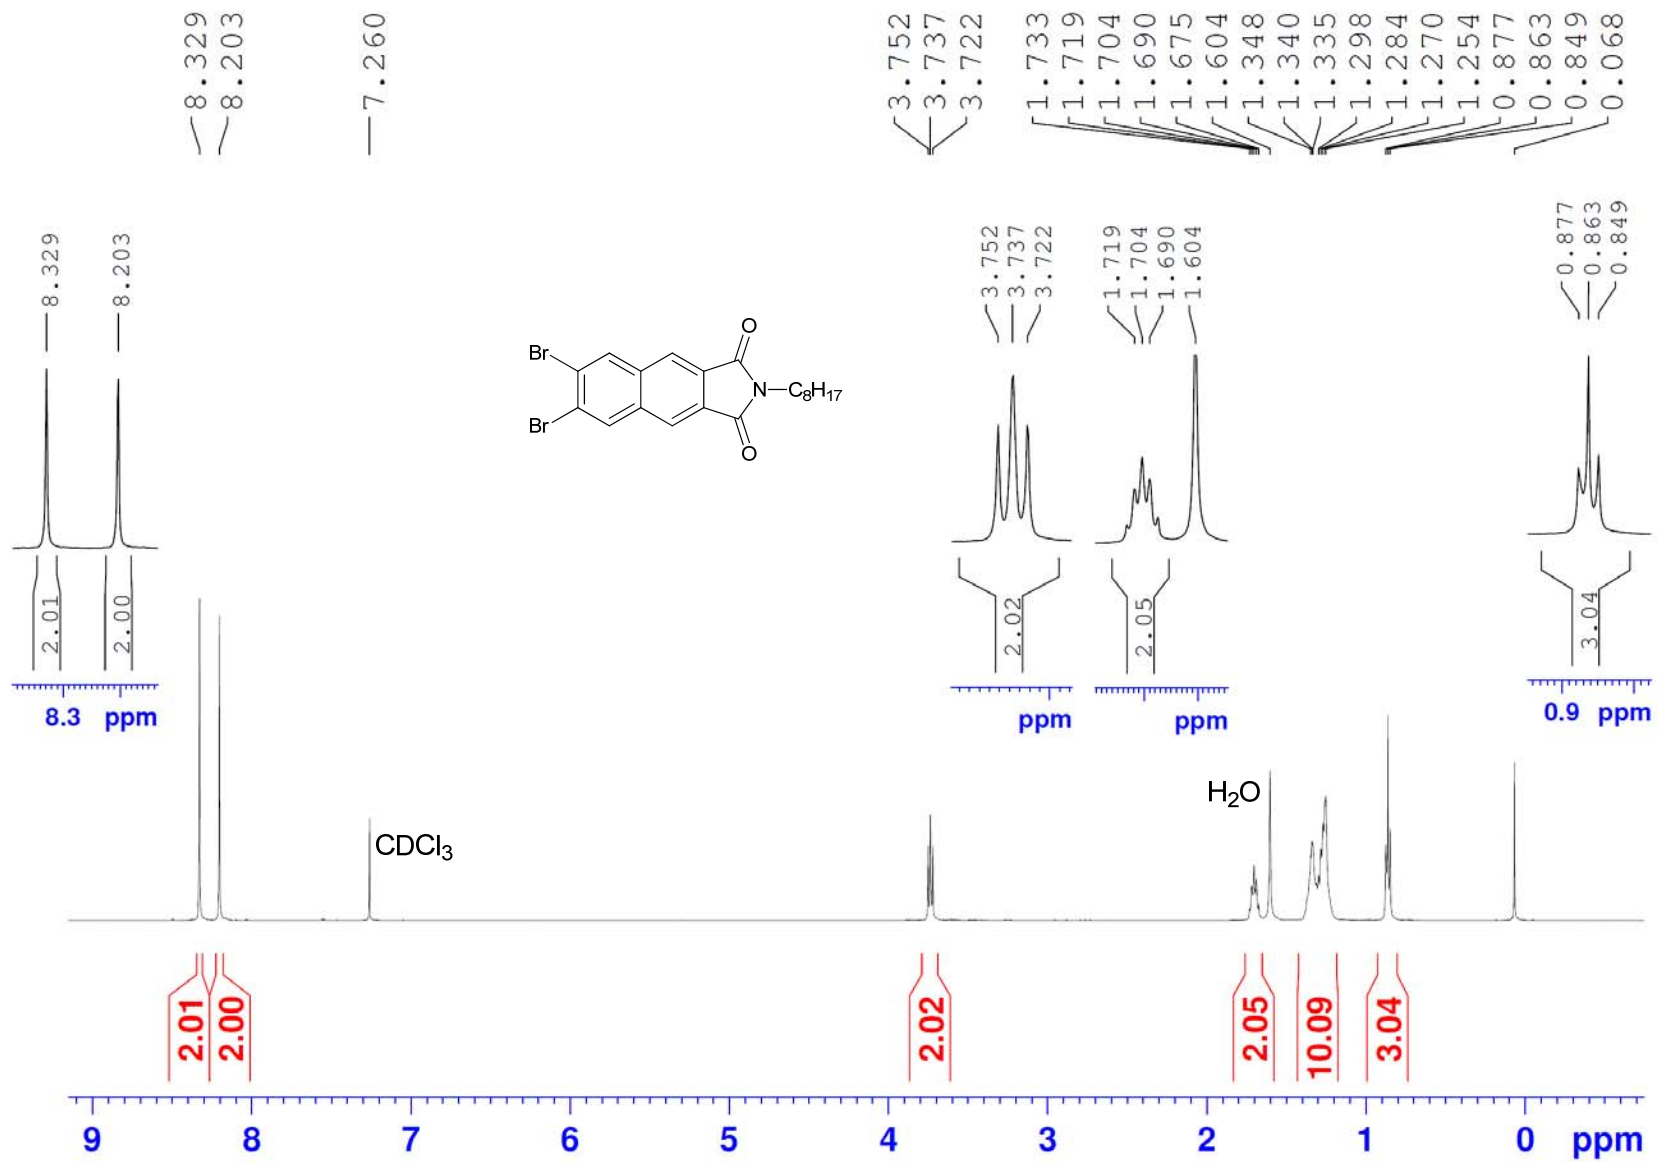

Figure S11 <sup>1</sup>H NMR (500 MHz) spectrum of compound 6 in CDCl<sub>3</sub>

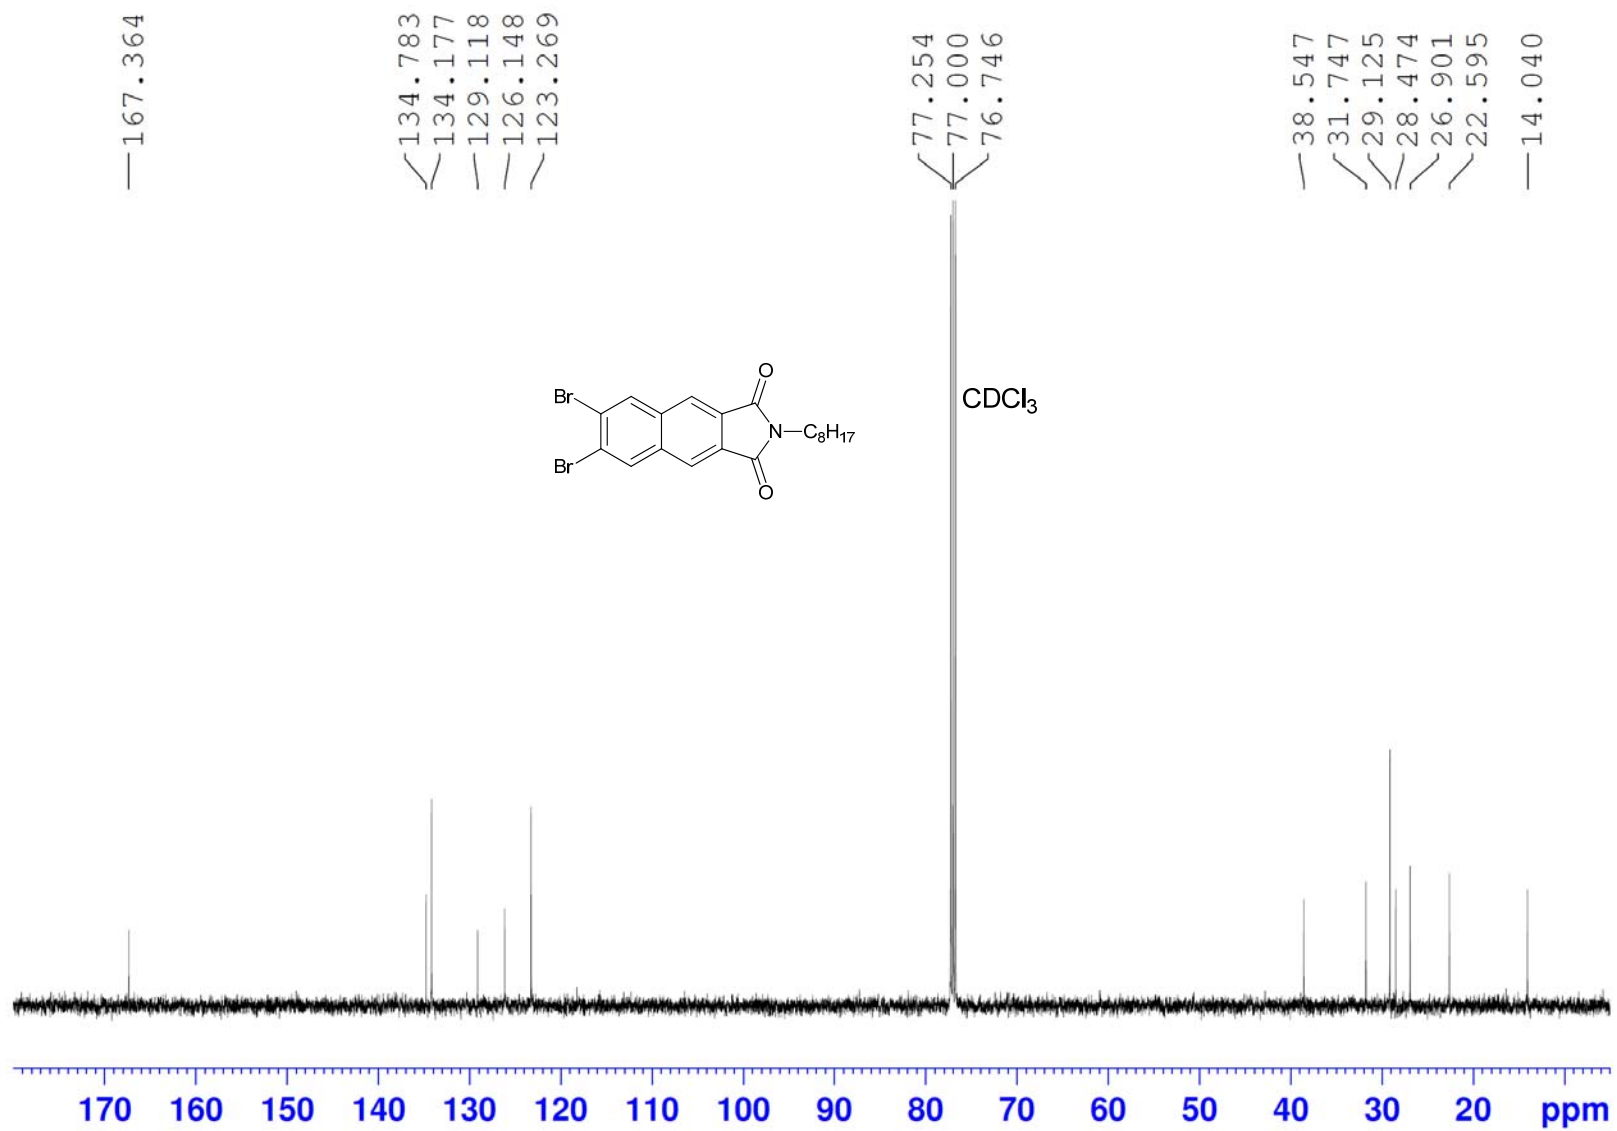

Figure S12  $^{13}\text{C}$  NMR (125 MHz) spectrum of compound 6 in  $\text{CDCl}_3$

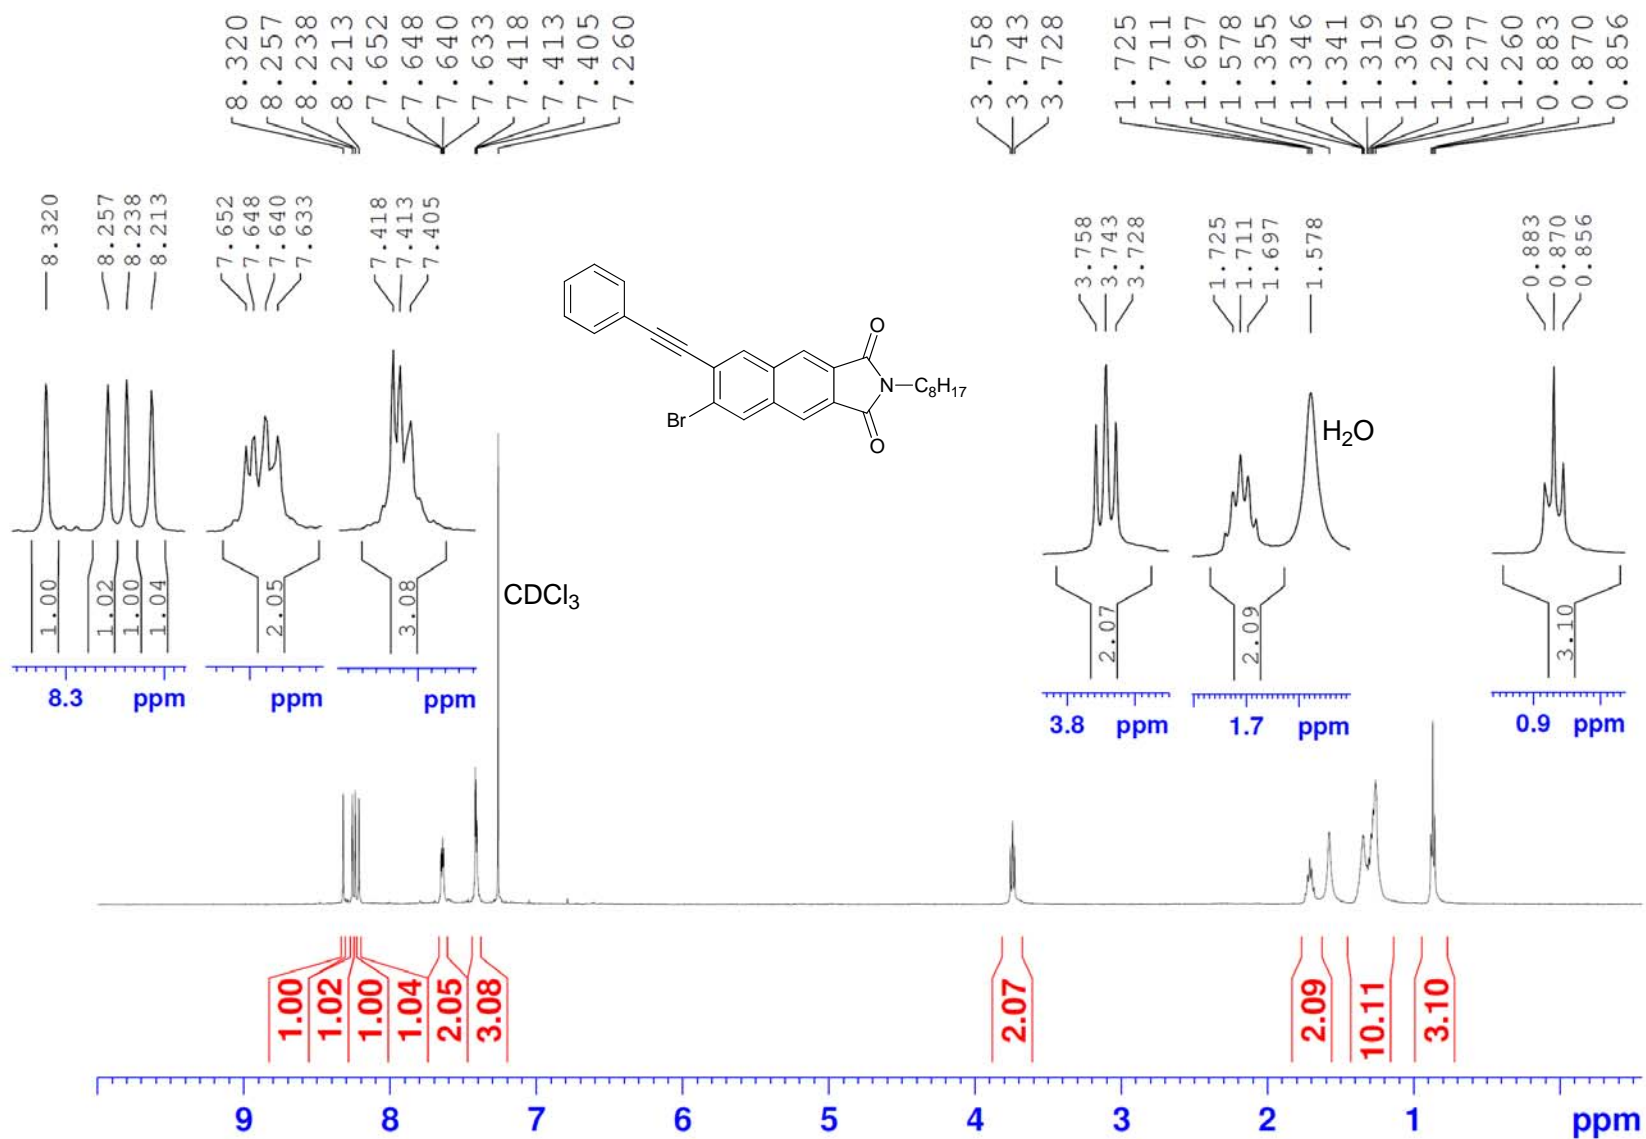

Figure S13  $^1\text{H}$  NMR (500 MHz) spectrum of compound 7 in  $\text{CDCl}_3$

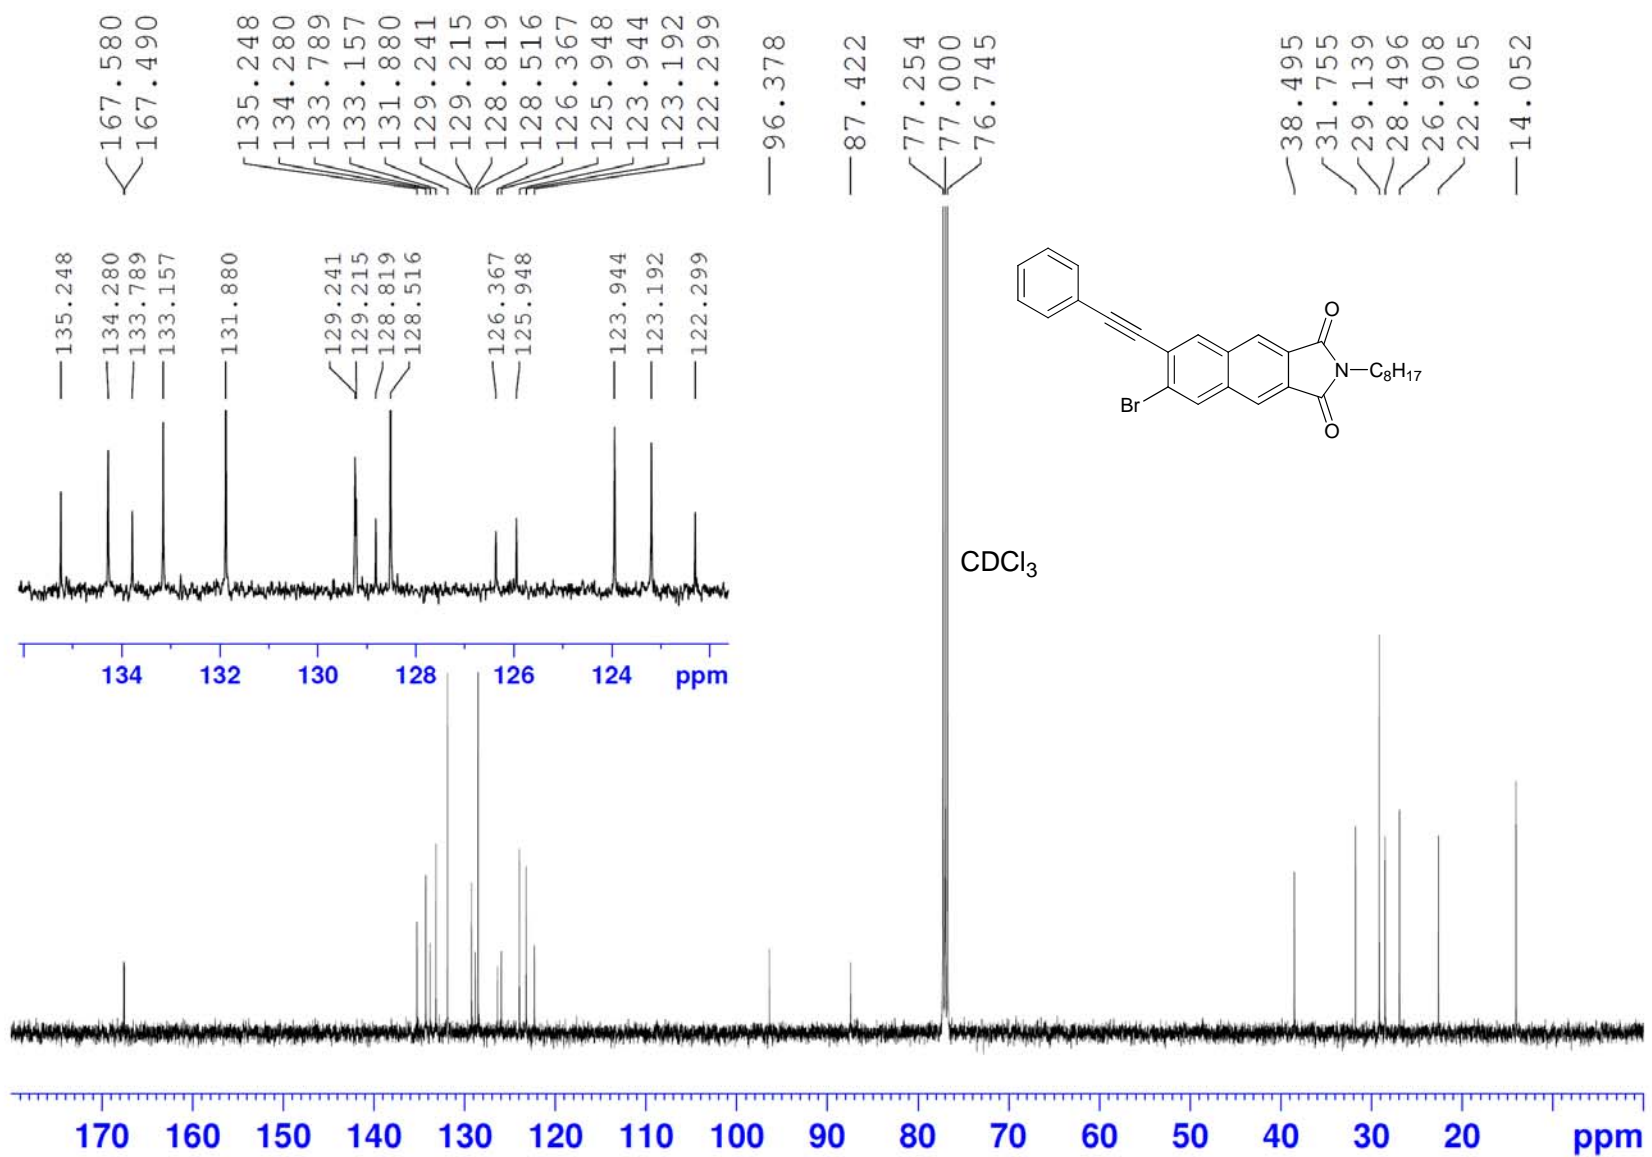

Figure S14  $^{13}\text{C}$  NMR (125 MHz) spectrum of compound 7 in  $\text{CDCl}_3$

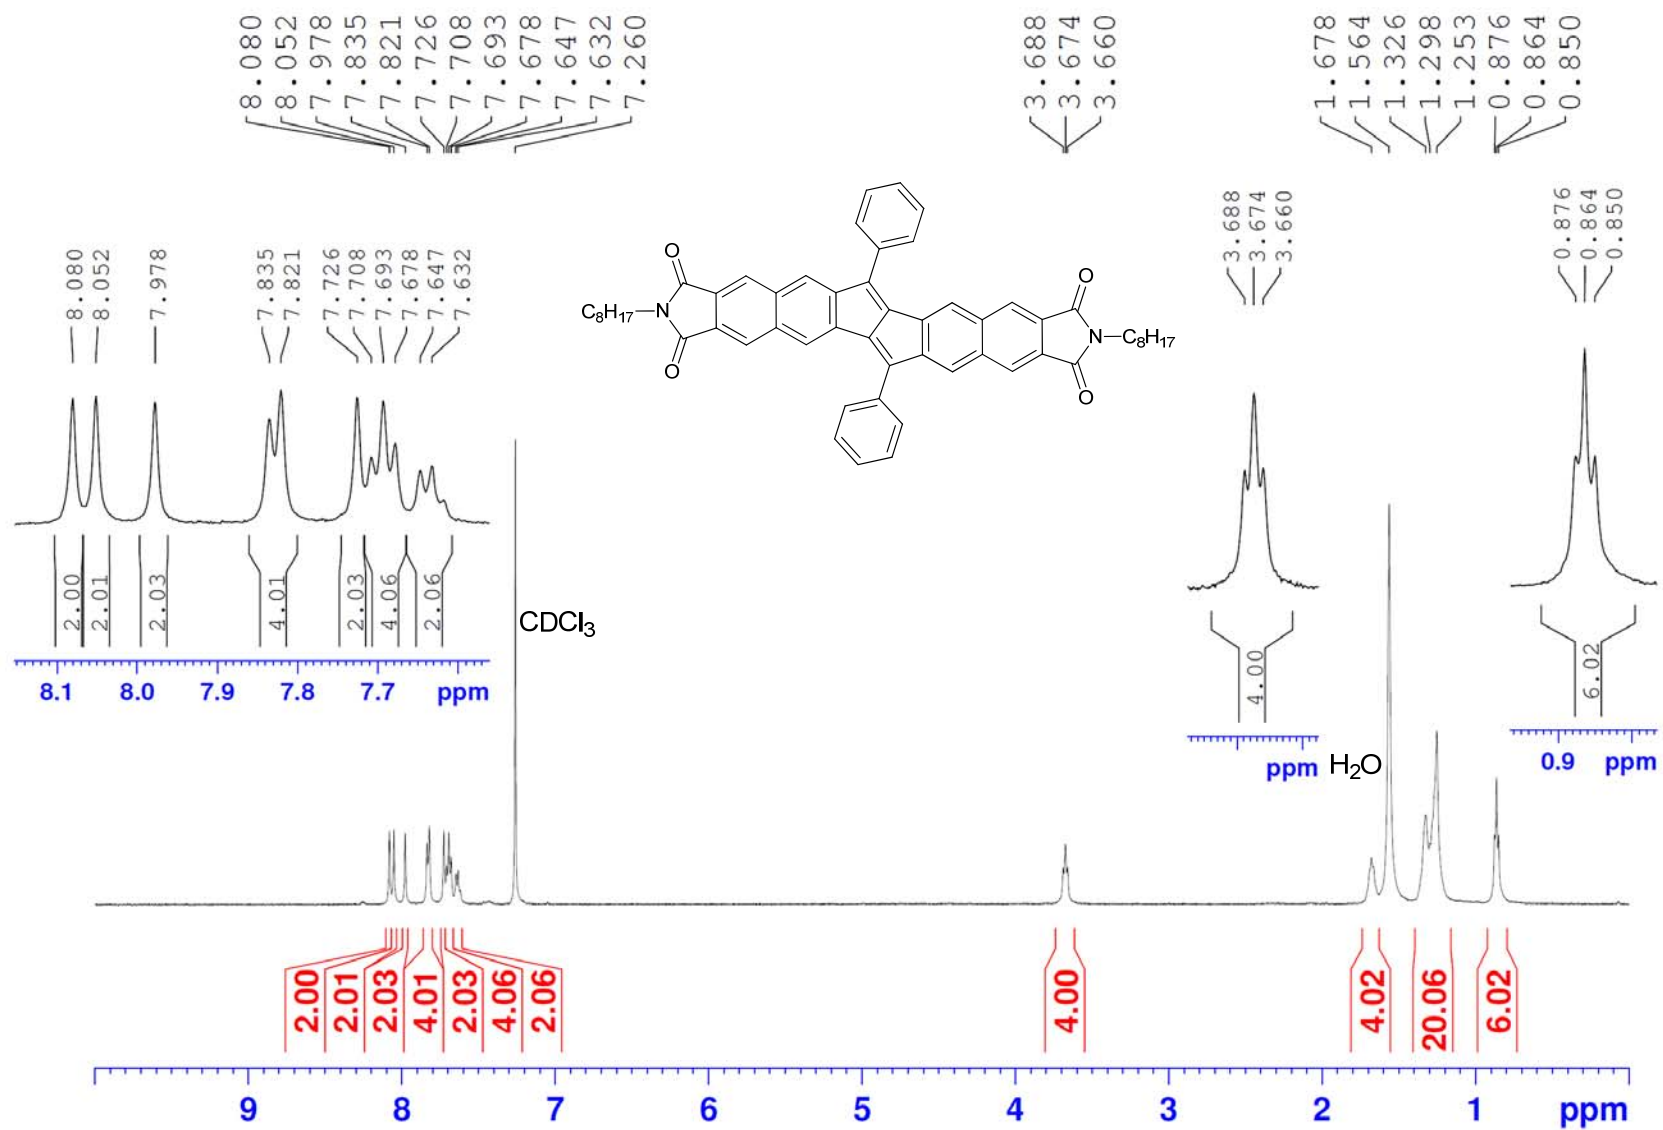

Figure S15 <sup>1</sup>H NMR (500 MHz) spectrum of compound **DNPDI** in CDCl<sub>3</sub>



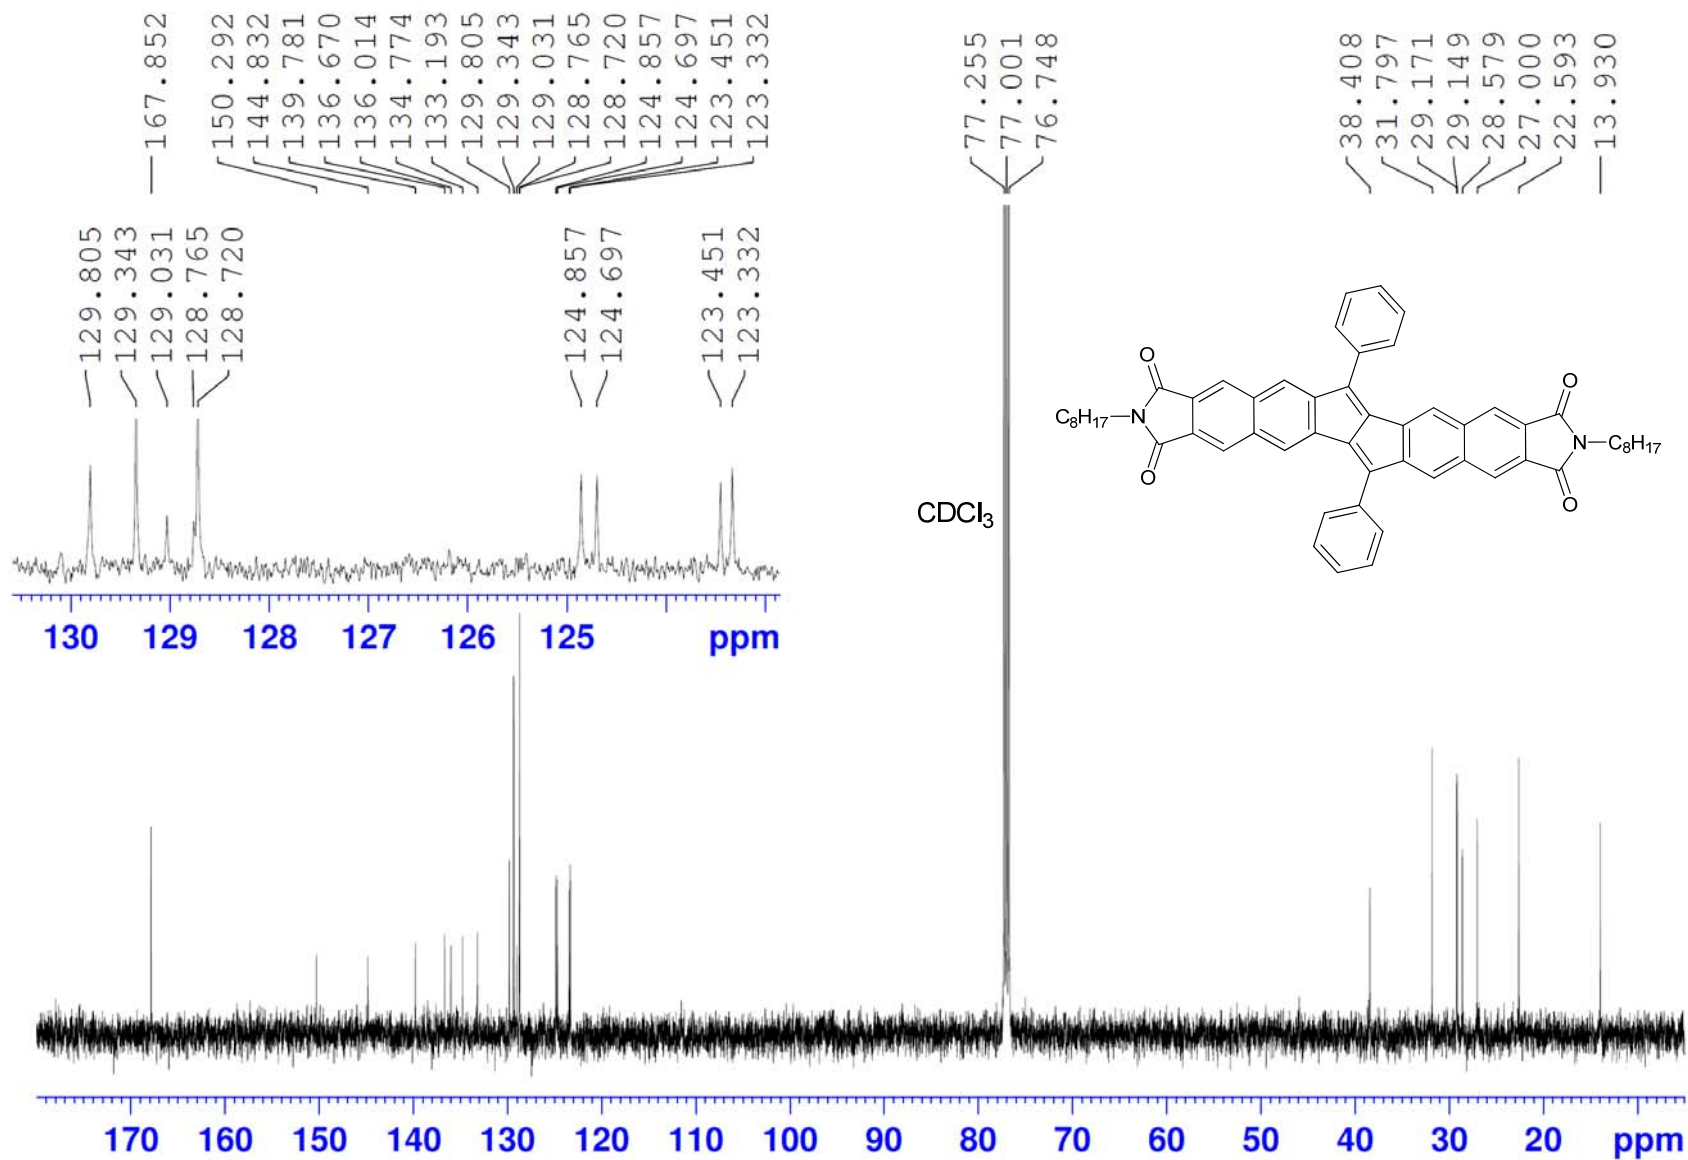

Figure S16  $^{13}\text{C}$  NMR (125 MHz) spectrum of compound DNPDI in  $\text{CDCl}_3$
